# Supplementary material for: Semi-curing combined with low-pressure mechanical pressing strategy for realizing high adhesion and low surface roughness Ag-NW transparent electrodes
Source: Royal Society of Chemistry journal article supplement (doi:10.1039/d5ta00523j), 2025-01-01
Supplement: d5ta00523j1.pdf [file d5ta00523j1.pdf]

## Supporting Information

### **Semi-Curing Combined with Low-Pressure Mechanical Pressing Strategy for Realizing High Adhesion and Low Surface Roughness Ag-NW Transparent Electrodes**

*Yiwen Du<sup>1,2,#</sup>, Mohan Li<sup>1,#</sup>, Yingying Kang<sup>1</sup>, Ying Sui<sup>1,2</sup>, Longlong Huang<sup>1,2</sup>, Hui  
Wang<sup>1,2</sup>, Ling Ye<sup>1,2</sup>, Zhi Yang<sup>1,2</sup>, Huagui Nie<sup>1,2,\*</sup>, He Huang<sup>1,\*</sup>, Yongjie Ge<sup>1,2,\*</sup>*

<sup>1</sup>Key Laboratory of Carbon Materials of Zhejiang Province, Wenzhou  
University, Wenzhou, 325035, P. R. China

<sup>2</sup>Institute of Industrial Carbon Materials and Hydrogen Energy Technology of  
Wenzhou University

\*Huagui Nie, Email: [huaguinie@126.com](mailto:huaguinie@126.com);

\*He Huang, Email: [huanghe@wzu.edu.cn](mailto:huanghe@wzu.edu.cn);

\*Yongjie Ge, Email: [geyongjie1220@126.com](mailto:geyongjie1220@126.com)

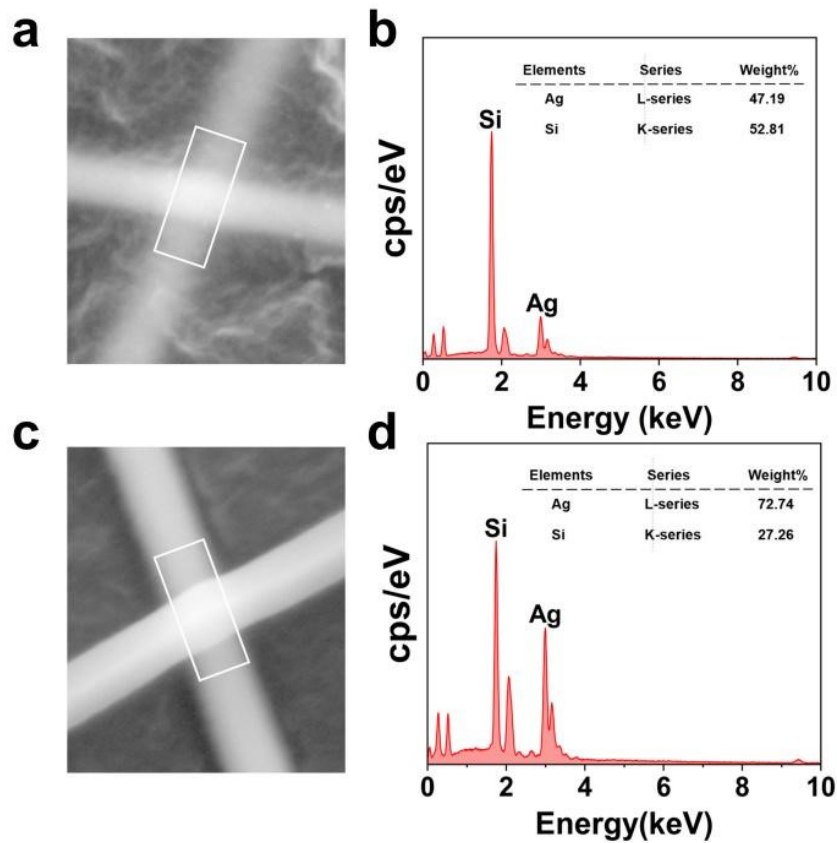

**Figure S1.** Characterization of silicon content near the NW-NW gaps on (a-b) PET/L-PDMS and (c-d) PET/S-PDMS substrates.

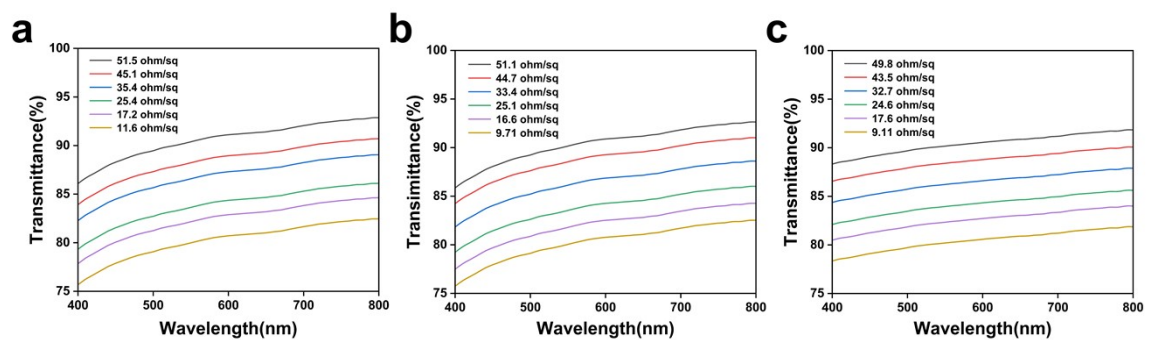

**Figure S2.** The transmittances of (a) P-PET/S-PDMS/AgNW, (b) PET/S-PDMS/AgNW, (c) PET/AgNW transparent electrodes within the 400-800 nm wavelength range.

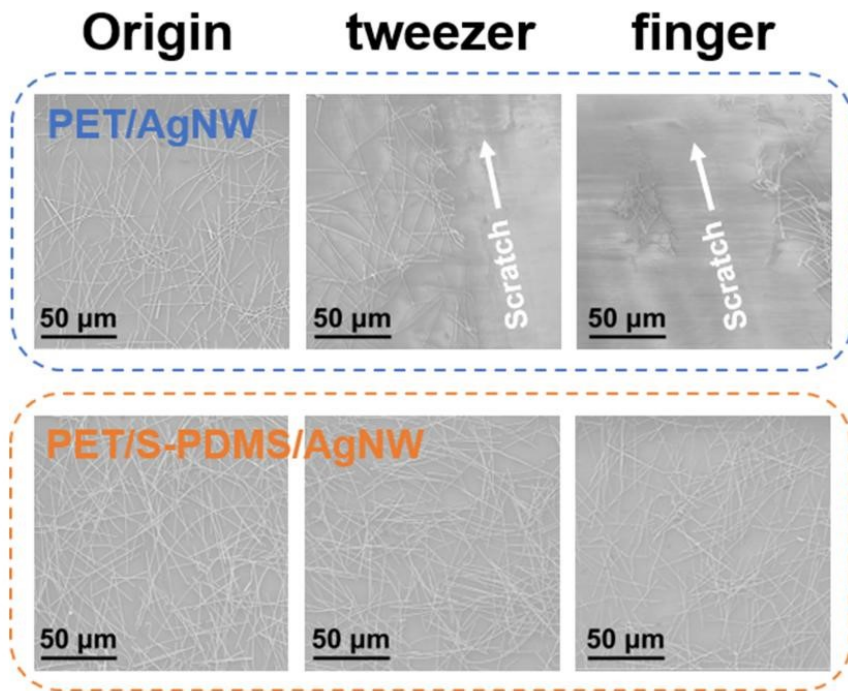

**Figure S3.** Scratch test on PET/AgNW and PET/S-PDMS/AgNW transparent electrodes simulating real-world conditions.

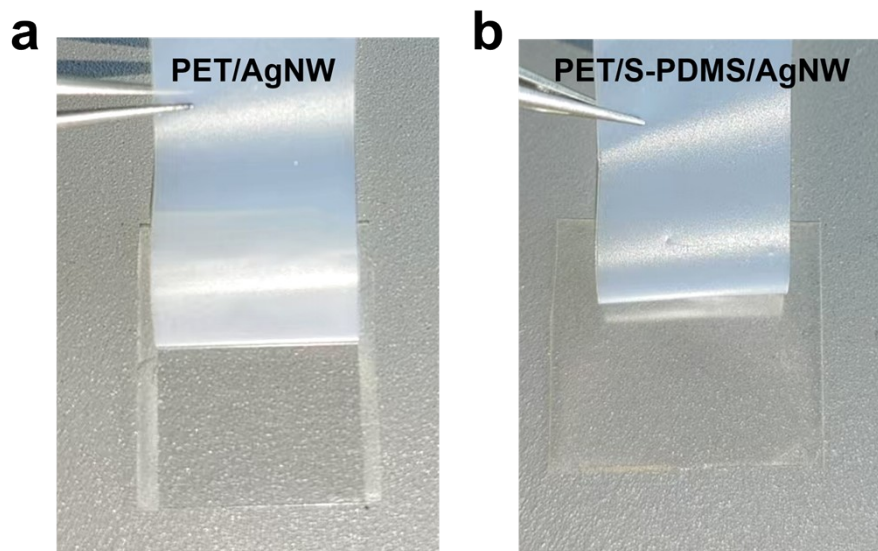

**Figure S4.** 3M tape peel test of PET/AgNW and PET/S-PDMS/AgNW transparent electrodes.

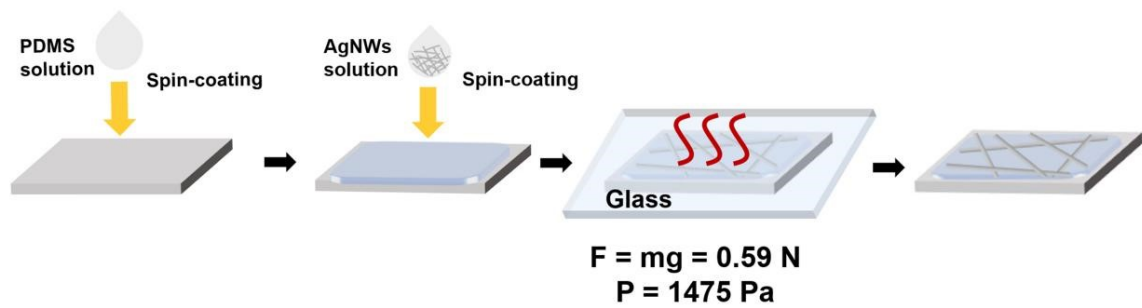

**Figure S5.** Schematic diagram of the preparation process for P-PET/S-PDMS/AgNW transparent electrodes.

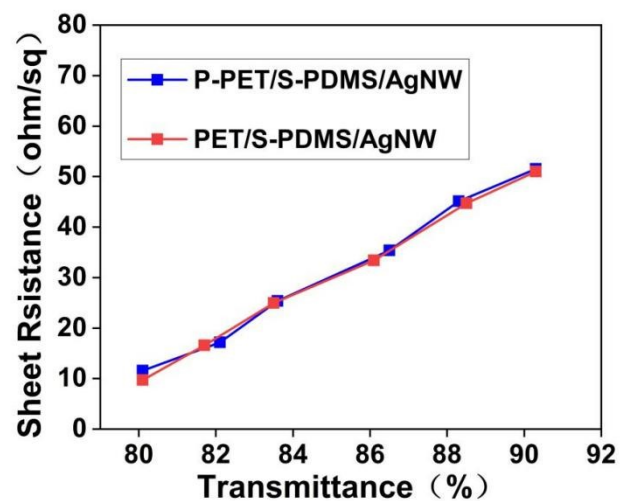

**Figure S6.** The sheet resistance of PET/S-PDMS/AgNW and P-PET/S-PDMS/AgNW transparent electrodes at different transmittances.

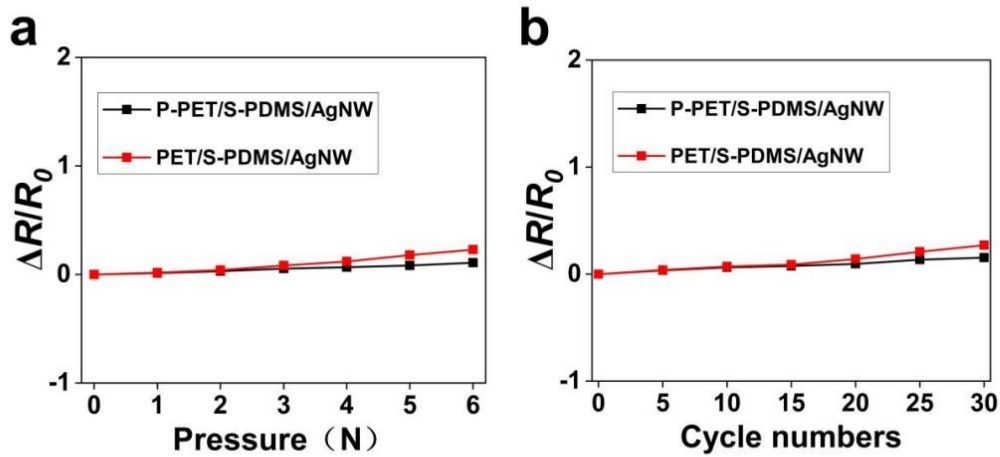

**Figure S7.** Characterization of the impact of combining semi-curing with the low-pressure mechanical pressing strategy on adhesion enhancement. (a) Trends in sheet resistance PET/S-PDMS/AgNW of and P-PET/S-PDMS/AgNW transparent electrodes with scratching pressure. (b) Trends in sheet resistance of PET/S-PDMS/AgNW and P-PET/S-PDMS/AgNW transparent electrodes with scratching times under 2 N scratching pressure.

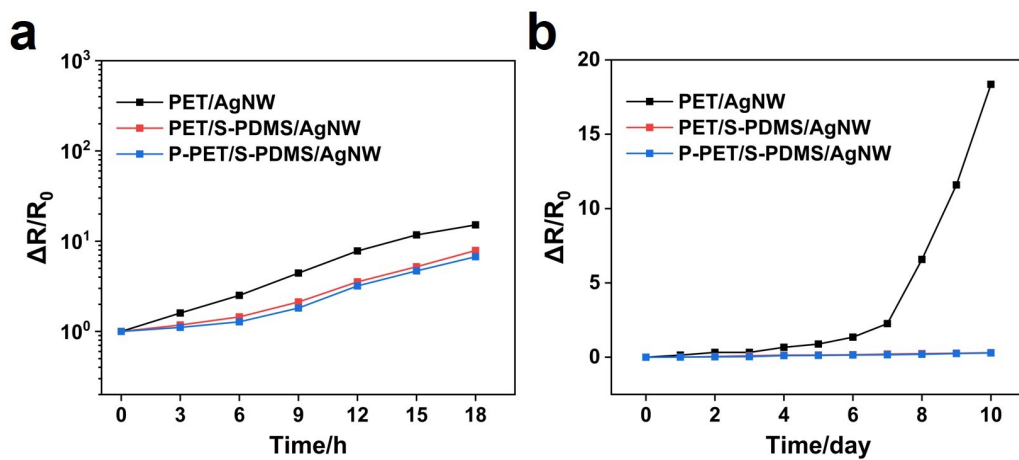

**Figure S8.** The Stability of P-PET/S-PDMS/AgNW, PET/S-PDMS/AgNW, and PET/AgNW transparent electrodes (a) exposed to  $H_2S$ -containing environments (the  $H_2S$  atmosphere was created by an aqueous solution of 0.01 M  $Na_2S$  + 0.01 M HCl) (b) in springtime atmospheric conditions.

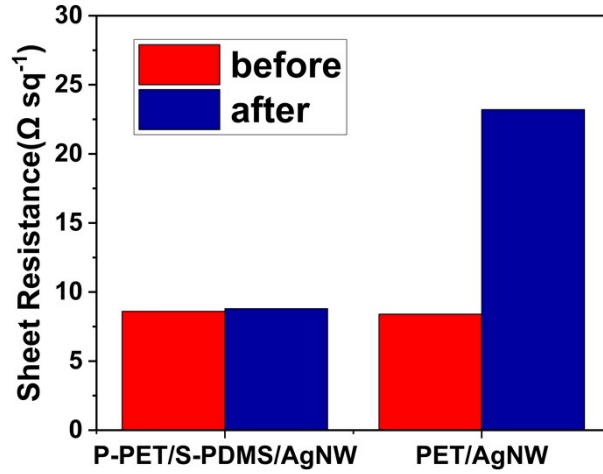

**Figure S9.** The sheet resistance of P-PET/S-PDMS/AgNW and PET/AgNW transparent electrodes before and after simulated rainfall washout.

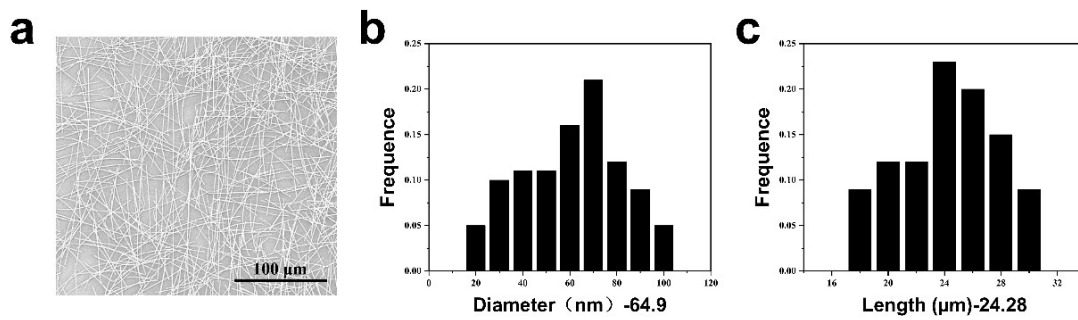

**Figure S10.** (a) SEM images of Ag NWs. (b) Statistic diameter distribution of Ag NWs extracted from Figure S10a (c) Statistic length distribution of Ag NWs extracted from Figure S10a.

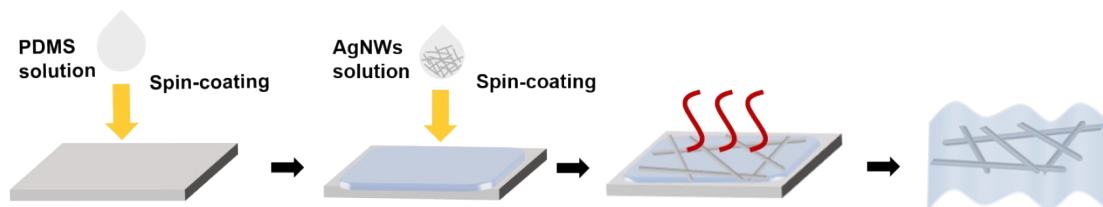

**Figure S11.** Schematic diagram of the preparation process for S-PDMS/AgNW transparent electrodes.
